# Supplementary material for: Lapatinib, Nilotinib and Lomitapide Inhibit Haemozoin Formation in Malaria Parasites
Source: PubMed Central journal article supplement (PMC7180468; doi:10.3390/molecules25071571), 2020-03-29
Supplement: molecules-25-01571-s001.pdf [file molecules-25-01571-s001.pdf]

Supplementary Material

## Lapatinib, nilotinib and lomitapide inhibit haemozoin formation in malaria parasites

Ana Carolina C. de Sousa <sup>1</sup>, Keletso Maepa <sup>2</sup>, Jill M. Combrinck <sup>2,4</sup> and Timothy J. Egan <sup>1,3,\*</sup>

<sup>1</sup> University of Cape Town, Faculty of Science, Department of Chemistry, Rondebosch 7701, South Africa; ana.desousa@uct.ac.za

<sup>2</sup> University of Cape Town, Department of Medicine, Division of Pharmacology, Faculty of Health Sciences, Observatory 7925, South Africa;

<sup>3</sup> University of Cape Town, Institute of Infectious Disease and Molecular Medicine, Rondebosch 7701, South Africa; [timothy.egan@uct.ac.za](mailto:timothy.egan@uct.ac.za)

<sup>4</sup> Wellcome Centre for Infectious Diseases Research in Africa, Institute of Infectious Disease and Molecular Medicine; [jill.combrinck@uct.ac.za](mailto:jill.combrinck@uct.ac.za)

\* Correspondence: [timothy.egan@uct.ac.za](mailto:timothy.egan@uct.ac.za)

**Table S1.** The top 4% FDA approved drugs classified by the SBVS and their binding affinity with the surface of  $\beta$ -haematin crystal.

| Zinc code        | Binding affinity | Drug              | Zinc code        | Binding affinity | Drug          |
|------------------|------------------|-------------------|------------------|------------------|---------------|
| zinc000001550499 | -13.4            | Cinacalcet        | zinc000011679756 | -11              | Eltrombopag   |
| zinc000052716421 | -12.9            | Flibanserin       | zinc000000608382 | -11              | Flavoxate     |
| zinc000000601229 | -12.3            | Azelastine        | zinc000000006157 | -10.9            | Epinastine    |
| zinc000012503187 | -12.3            | Conivaptan        | zinc000001895505 | -10.9            | Bazedoxifene  |
| zinc000022010649 | -12.2            | Panobinostat      | zinc000100070954 | -10.9            | Glimepiride   |
| zinc000003816514 | -12              | Rolapitant        | zinc000004175630 | -10.8            | Orap          |
| zinc000003784182 | -12              | Adapalene         | zinc000003823475 | -10.8            | Eletriptan    |
| zinc000003978005 | -12              | Dihydroergotamine | zinc000052955754 | -10.8            | Ergotamine    |
| zinc000019632618 | -12              | Imatinib          | zinc000002570895 | -10.8            | Celebrex      |
| zinc000000968263 | -11.9            | Cyclobenzaprine   | zinc000003874185 | -10.7            | Mefloquine    |
| zinc000003816287 | -11.9            | Axitinib          | zinc000000004351 | -10.7            | Alaway        |
| zinc000027990463 | -11.8            | Lomitapide        | zinc000000001148 | -10.7            | Doxepin       |
| zinc000006716957 | -11.8            | Nilotinib         | zinc000000075126 | -10.7            | Zofran        |
| zinc000001530977 | -11.8            | Naftifine         | zinc000007997897 | -10.7            | Naftin        |
| zinc000011681563 | -11.8            | Netupitant        | zinc000000057522 | -10.6            | Ting          |
| zinc000000025958 | -11.7            | Rucaparib         | zinc000000001370 | -10.6            | Estazolam     |
| zinc000000538312 | -11.6            | Risperidone       | zinc000030691797 | -10.6            | Perampanel    |
| zinc000068202099 | -11.6            | Sonidegib         | zinc000029416466 | -10.6            | Sqv           |
| zinc000003776633 | -11.5            | Acrivastine       | zinc000000002272 | -10.6            | Ketoprofen    |
| zinc000003798734 | -11.5            | Acitretin         | zinc000000004893 | -10.5            | Asenapine     |
| zinc000000968264 | -11.5            | Cyproheptadine    | zinc000001530625 | -10.5            | Dronabinol    |
| zinc000000001261 | -11.4            | Desloratadine     | zinc000000968257 | -10.5            | Amitriptyline |
| zinc000001550477 | -11.4            | Lapatinib         | zinc000003786192 | -10.5            | Sulindac      |
| zinc000003939013 | -11.3            | Fosaprepitant     | zinc000001539579 | -10.5            | Targretin     |

|                  |       |               |                  |       |               |
|------------------|-------|---------------|------------------|-------|---------------|
| zinc000070466416 | -11.2 | Cabozantinib  | zinc000000000740 | -10.5 | Restoril      |
| zinc000001530886 | -11.2 | Telmisartan   | zinc000000006427 | -10.5 | Diazepam      |
| zinc000051951647 | -11   | Panobinostat  | zinc000000002299 | -10.5 | Asenapine     |
| zinc000003831151 | -11   | Montelukast   | zinc000006745272 | -10.5 | Stivarga      |
| zinc000027428713 | -11   | Aprepitant    | zinc000000537931 | -10.4 | Loratadine    |
| zinc000003831332 | -11   | Phylloquinone | zinc000095616937 | -10.4 | Dasabuvir     |
| zinc00000004785  | -11   | Carbamazepine | zinc000043207238 | -10.4 | Canagliflozin |
| zinc000043206370 | -11   | Niraparib     | zinc000000000323 | -10.4 | Flurbiprofen  |

**Table S2.** The Chemdiv purchased top ranked compounds classified by the EON rank and their smiles code

| EON rank       | Molecule Name | Smiles                                                                                        |
|----------------|---------------|-----------------------------------------------------------------------------------------------|
| Query molecule | Lapatinib     | <chem>O=S(CCNCC1=CC=C(C2=CC=C3N=CN=C(NC4=CC=C(OCC5=CC=CC(F)=C5)C(Cl)=C4)C3=C2)O1)(C)=O</chem> |
| 1              | V018-2342     | <chem>Cc(cc1)ccc1NC(c1csc(-c(cccc2)c2OCc(cc2)ccc2F)n1)=O</chem>                               |
| 2              | 2028-0102     | <chem>CCOC(C([C@@H])(c1cccc1)N1C2=O)=C(C)N=C1S/C2=C\c(cccc1)c1OCc(cccc1)c1Cl)=O</chem>        |
| 3              | G637-0552     | <chem>CC(c1cccc(NC(C(CC2)CCN2S(c2c(/C=C/c3ccc(C)cc3)onc2C)(=O)=O)=O)c1)=O</chem>              |
| 4              | S558-0318     | <chem>O=C(Nc1cccc(F)c1)N(CC1)C[C@@H]1OC(cccc1)c1-c1nc(-c2nccnc2)no1</chem>                    |
| 5              | G637-0483     | <chem>Cc1noc(/C=C/c2ccc(C)cc2)c1S(N(CC1)CCC1C(Nc(cccc1)c1F)=O)(=O)=O</chem>                   |
| 6              | Z250-1328     | <chem>O=C([C@H](CCC1)CN1C(NC1=O)=Nc2c1scc2-c1cccc1)NCc1ncccc1</chem>                          |
| 7              | 2029-0102     | <chem>CCOC(C([C@@H])(c(cc1)ccc1OC)N1C2=O)=C(C)N=C1S/C2=C\c(cccc1)c1OCc(cccc1)c1Cl)=O</chem>   |
| 8              | L227-0004     | <chem>Cc(cc1)ccc1-c1nn2c(N(CC3)CCC3C(Nc3cccc(C(F)(F)F)c3)=O)cc(C)nc2c1</chem>                 |
| 9              | 5648-2232     | <chem>O=C(CN(C(/C/S1)=C/c(cccc2)c2OCc2cc(F)ccc2)=O)C1=O)N1CCOCC1</chem>                       |
| 10             | Z250-1285     | <chem>O=C([C@H](CCC1)CN1C(NC1=O)=Nc2c1scc2-c1cccc1)NCCC1=CCCCC1</chem>                        |
| 11             | M347-0486     | <chem>Cc1csc(-c2cc(S(Nc(cccc3)c3F)(=O)=O)cn2CC(N2CCOCC2)=O)n1</chem>                          |
| 12             | Z250-1934     | <chem>O=C([C@H](CCC1)CN1C(NC1=O)=Nc2c1scc2-c1cccc1)N1CCCC1</chem>                             |
| 13             | C514-0440     | <chem>Cc1noc(/C=C/c2ccc(O)c2)c1S(N(CC1)CCC1C(Nc1cc(SC)ccc1)=O)(=O)=O</chem>                   |
| 14             | L520-0507     | <chem>Cc1cc(C(N(C5C2)[C@@H]2C(NCc2csc(-c3cccc3)n2)=O)=O)cc(C)c1</chem>                        |
| 15             | M347-0487     | <chem>Cc1csc(-c2cc(S(Nc3cc(F)ccc3)(=O)=O)cn2CC(N2CCOCC2)=O)n1</chem>                          |
| 16             | Z250-2563     | <chem>Cc1cccc(-c2csc(C(N3)=O)c2N=C3N(CC2)CCC2C(NCC=C)=O)c1</chem>                             |
| 17             | F424-1065     | <chem>CCc(cc1)ccc1-c(cc12)nn1C(SCC(N(CC1)CCN1c(cccc1)c1F)=O)=NCC2=O</chem>                    |
| 18             | D356-2238     | <chem>Cc1cccc(CSCCNC(C(CC2)CCN2S(Cc(c(F)ccc2)c2Cl)(=O)=O)=O)c1</chem>                         |
| 19             | C928-0456     | <chem>COc(ccc(-c1nc(CCNS(c2cc(CCCC3)c3cc2)(=O)=O)cs1)c1)c1OC</chem>                           |
| 20             | Z250-1085     | <chem>CC(C)NC(C(CC1)CCN1C(NC1=O)=Nc2c1scc2-c(cccc1)c1F)=O</chem>                              |
| 21             | Z250-2571     | <chem>Cc1cccc(-c2csc(C(N3)=O)c2N=C3N(CC2)CCC2C(NCCC2=CCCCC2)=O)c1</chem>                      |
| 22             | Z250-1343     | <chem>O=C([C@H](CCC1)CN1C(NC1=O)=Nc2c1scc2-c1cccc1)NC[C@@H]1OCCCC1</chem>                     |
| 23             | F061-1291     | <chem>Cc1noc(/C=C/c2c(C)ccc(C)c2)c1S(N(CCC1)C[C@H]1C(NCc1ncccc1)=O)(=O)=O</chem>              |
| 24             | C514-0466     | <chem>Cc1noc(/C=C/c2ccc(O)c2)c1S(N(CC1)CCC1C(NCc1cccc1)=O)(=O)=O</chem>                       |
| 25             | 5762-1653     | <chem>O=C(/C/N1)=C\c2cn(Cc3cccc3)c3c2cccc3)N(Cc(cccc2)c2F)C1=O</chem>                         |

|    |                  |                                                                                        |
|----|------------------|----------------------------------------------------------------------------------------|
| 26 | SA04-0326        | <chem>Cc1ncc(COCC2CC2)c([C@H](CCC2)CN2C(Cc2cc(OC)ccc2)=O)n1</chem>                     |
| 27 | C514-0233        | <chem>CCc1cccc(NC(C(CC2)CCN2S(c2c/C=C/c3cccs3)onc2C)(=O)=O)=O)c1</chem>                |
| 28 | 2028-0099        | <chem>CCOC(C([C@H](c1cccc1)N1C2=O)=C(C)N=C1S/C2=C \ c(cccc1)c1OCc(cc1)ccc1Cl)=O</chem> |
| 29 | V003-3993        | <chem>COc(cc1)cc([C@H](CN(C2)C(c3cccc(Cl)c3)=O)[C@H]2C(NCc2ncccc2)=O)c1OC</chem>       |
| 30 | S581-0950        | <chem>COc(cccc1)c1N(CC1)CCN1C(C[C@@H](CCCCN1Cc2ccccc2)C1=O)=O</chem>                   |
| 31 | V015-2163        | <chem>CCC(CC)C(Nc(cc1)ccc1-c1nc(-c(cc2)ccc2OC)ccc1)=O</chem>                           |
| 32 | S544-0192        | <chem>Cc1cc(C)nn1Cc1ccc(C(N2C[C@H](CCOc(cccc3)c3F)CC2)=O)o1</chem>                     |
| 33 | K906-3779        | <chem>Cc1noc(/C=C/c2cccs2)c1S(N(CC1)CCC1C(N1CCCCC1)=O)(=O)=O</chem>                    |
| 34 | C776-4109        | <chem>Cc1c(Cn2c(N(CC3)CCC3C(Nc3cc(OC)cc(OC)c3)=O)nc3c2ccccc3)cccc1</chem>              |
| 35 | S606-1398        | <chem>O=C(C(C=C1)=NNC1=O)N(CC1)C[C@H]1N(c1ncccc1N1CC2CCCCC2)C1=O</chem>                |
| 36 | L227-0081        | <chem>CC(C)c(cc1)ccc1NC(C(CC1)CCN1c1cc(C)nc2cc(-c3ccc(C)cc3)nn12)=O</chem>             |
| 37 | Z250-1127        | <chem>NC(CNC(C(CC1)CCN1C(NC1=O)=Nc2c1scc2-c(cccc1)c1F)=O)=O</chem>                     |
| 38 | G637-0592        | <chem>Cc1noc(/C=C/c2ccc(C)cc2)c1S(N(CC1)CCC1C(Nc(cc1)cc(Cl)c1F)=O)(=O)=O</chem>        |
| 39 | G237-0141        | <chem>Cc1nc(ccc(S(N(CC(Nc(cc2)cc3c2OCO3)=O)Cc2ccccc2)(=O)=O)c2)c2s1</chem>             |
| 40 | C514-0464        | <chem>C[C@H](CCC1)[C@H](C)[C@@H]1NC(C(CC1)CCN1S(c1c/C=C/c2ccco2)onc1C)(=O)=O)=O</chem> |
| 41 | M136-0585        | <chem>Cc(cc1)ccc1-c1noc(-c2ccnc2N(CC2)CCC2C(NCCCOC)=O)n1</chem>                        |
| 42 | Z250-1650        | <chem>CC[C@H](C)NC([C@H](CCC1)CN1C(NC1=O)=Nc2c1scc2-c(cc1)cc(OC)c1OC)=O</chem>         |
| 43 | L520-0422        | <chem>O=C(COc1cccc1)N(CSC1)[C@@H]1C(NCc1csc(-c2ccccc2)n1)=O</chem>                     |
| 44 | V022-7995        | <chem>O=C(c1csc(-c2cccc(OCc(cc3)cc(Cl)c3Cl)c2)n1)Nc1cccc1</chem>                       |
| 45 | E222-0034        | <chem>COC(c1ccc(-c2ccco2)n1CC(N1CCC(Cc2ccccc2)CC1)=O)=O</chem>                         |
| 46 | 1123-0326        | <chem>O=C(CSc1nnnn1-c1cccc1)N/N=C/c(cc1)ccc1Br</chem>                                  |
| 47 | C890-0334        | <chem>C[C@@H](C(NCc1ncccc1)=O)n(c(C)c1C=NN2c3ccccc3)c(C)c1C2=O</chem>                  |
| 48 | G637-3522        | <chem>Cc1noc(/C=C/c(ccc(F)c2)c2F)c1S(N(CC1)CCC1C(Nc1cc(SC)ccc1)=O)(=O)=O</chem>        |
| 49 | V020-5238        | <chem>COc(cccc1)c1-c(cc1)cc2c1oc([C@H](CCC1)N1C(C1CCCC1)=O)n2</chem>                   |
| 50 | 8013-5505        | <chem>Cc1c(-c2c[nH]c3c2ccccc3)nc(-c(cc2)cc(OC)c2OC)s1</chem>                           |
| 51 | SC13-0036        | <chem>O=C(COc(cc1)ccc1F)N(CCC1)C[C@@H]1N(Cc1ncccc1)C(C1CCCC1)=O</chem>                 |
| 52 | G682-0058        | <chem>Cc(cc1C)cc(C)c1NC(CN(N=C(c1cccc1)c1c2ccccc1)S2(=O)=O)=O</chem>                   |
| 53 | Z250-1086        | <chem>CC[C@H](C)NC(C(CC1)CCN1C(NC1=O)=Nc2c1scc2-c(cccc1)c1F)=O</chem>                  |
| 54 | F731-0128        | <chem>CCN(c(cccc1)c1Oc(cc1)c2cc1NC(c1cc(C)ccc1)=O)C2=O</chem>                          |
| 55 | L227-1125        | <chem>Cc1cc(-c2nn3c(N(CC4)CCC4C(Nc(cc4)ccc4F)=O)cc(C)nc3c2)cc(C)c1</chem>              |
| 56 | D400-0082        | <chem>COc1c(CNC(COc2cc(-c3nc(-c4ccccc4)no3)ccc2)=O)cccc1</chem>                        |
| 57 | G883-0692        | <chem>Cc1cc(C)nn1Cc1ccc(C(NCc(cc2)cc(CC3)c2N3C(c2ccccc2)=O)=O)o1</chem>                |
| 58 | G420-0186        | <chem>Cc(cc1)ccc1-c1nn(ccnc2SCC(N(CC3)CCN3c(cc3)ccc3F)=O)c2c1</chem>                   |
| 59 | F758-0175        | <chem>CCOc1c(CNC([C@@H](CCC2)CN2c2nc3ncccc3n3c2ccc3)=O)cccc1</chem>                    |
| 60 | S558-0161        | <chem>O=C(Nc(cccc1)c1F)N(CC1)C[C@H]1Oc(cccc1)c1-c1nc(-c2ccccc2)no1</chem>              |
| 61 | L437-0064        | <chem>O=C(NCCc1cccc1)Nc(cccc1)c1-c1cc(cccc2)c2[nH]1</chem>                             |
| 62 | C514-0129        | <chem>Cc1noc(/C=C/c2cccs2)c1S(N(CC1)CCC1C(Nc1ncccc1C)=O)(=O)=O</chem>                  |
| 63 | L227-0209        | <chem>Cc1cccc(CNC(C(CC2)CCN2c2cc(C)nc3cc(-c(cc4)ccc4Cl)nn23)=O)c1</chem>               |
| 64 | <u>V001-1009</u> | <chem>O=C(Nc1cccc1)N(CCC1)[C@H]1c1nc(cc(cc2)-c(cccc3)c3F)c2o1</chem>                   |

|                |                  |                                                                                                 |
|----------------|------------------|-------------------------------------------------------------------------------------------------|
| 65             | L227-0264        | <chem>Cc1nc2cc(-c(cc3)ccc3Cl)nn2c(N(CC2)CCC2C(NCCc2ccco2)=O)c1</chem>                           |
| 66             | Z250-0045        | <chem>CCOC([C@H])(CCC1)CN1C(NC1=O)=Nc2c1scc2-c1ccc(C)cc1=O</chem>                               |
| 67             | L227-1012        | <chem>Cc1nc2cc(-c3ccccc3)nn2c(N(CC2)CCC2C(N[C@H])(CCC2)c3c2ccccc3)=O)c1</chem>                  |
| 68             | SA57-0395        | <chem>Cc1c(Cn2nccc2)c(C(N(CC2)CCC2(C2)OCC[C@@H]2Oc2ncnc2)=O)no1</chem>                          |
| 69             | L227-0187        | <chem>Cc1nc2cc(-c(cc3)ccc3Cl)nn2c(N(CC2)CCC2C(NCc2ccco2)=O)c1</chem>                            |
| 70             | F113-0158        | <chem>Cc(cc1)ccc1-c1nc2ccnc2n1CCNC(Nc1cccc(SC)c1)=O</chem>                                      |
| 71             | Z250-1271        | <chem>CC[C@@H](C)NC([C@@H])(CCC1)CN1C(NC1=O)=Nc2c1scc2-c1cccc1=O</chem>                         |
| 72             | Z250-0354        | <chem>O=C1NC(N(CC2)CCN2c(cccc2)c2F)=Nc2c1scc2-c1cc(F)ccc1</chem>                                |
| 73             | E756-0628        | <chem>Cn(c(cc1)c2cc1OC)c(C(NCCc(cccc1)c1OC)=O)c2N(CCC1)C1=O</chem>                              |
| 74             | G637-0718        | <chem>CCCN(C(C(CCI)CCN1S(c1c/C=C/c2ccc(C)cc2)onc1C)(=O)=O)c(ccc1)c1F</chem>                     |
| 75             | Z250-1136        | <chem>O=C(C(CCI)CCN1C(NC1=O)=Nc2c1scc2-c(ccc1)c1F)N[C@H](CC1)c2c1cccc2</chem>                   |
| 76             | Y050-0064        | <chem>CN(CC(Nc(cc1)cc2c1OCO2)=O)S(c(cc(cc1)OC)c1OC)(=O)=O</chem>                                |
| 77             | Z250-1648        | <chem>CCCN([C@H])(CCC1)CN1C(NC1=O)=Nc2c1scc2-c(cc1)cc(OC)c1OC=O</chem>                          |
| 78             | 1185-0223        | <chem>Cc1c(-c(cc2)ccc2OC)nc(Nc2ccc(C)cc2)s1</chem>                                              |
| 80             | G664-0290        | <chem>O=C(c(sc1ncccc11)c1-n1cccc1)NCCc1cccc1</chem>                                             |
| Query molecule | Nilotinib        | <chem>CC1=CN(C2=CC(NC(C3=CC(NC4=NC=CC(C5=CC=CN=C5)=N4)=C(C=C3)C)=O)=CC(C(F)(F)F)=C2)C=N1</chem> |
| 1              | L775-0627        | <chem>Cn1nc(COCc2cc(F)ccc2)c(C2)c1CCN2C(Nc1cccc(SC)c1)=O</chem>                                 |
| 2              | F871-0652        | <chem>Cc(cc1)ccc1-c1nccc(Nc2cccc(C(Nc3cc(OC)ccc3)=O)c2)n1</chem>                                |
| 3              | 2688-0031        | <chem>O=C(c1cccc(Nc2nc(-c3ccccc3)c(cc(cc3)Cl)c3n2)c1)Nc(cc1)ccc1Cl</chem>                       |
| 4              | Y041-7161        | <chem>O=C(c1cc(Nc2nccc2)ccc1)NCCc1cccc1</chem>                                                  |
| 5              | L775-0534        | <chem>Cc1ccc(COCc2nn(C)c(CC3)c2CN3C(Nc2cc(C)ccc2)=O)cc1</chem>                                  |
| 6              | S926-7975        | <chem>O=C(CCn1nccc1)N(CCC1)C[C@H]1OCc1noc(-c2nccc2)n1</chem>                                    |
| 7              | L775-0642        | <chem>Cn1nc(COCc2cccc(F)c2)c(C2)c1CCN2C(Nc(cc1)ccc1F)=O</chem>                                  |
| 8              | F871-0684        | <chem>Cc(cc1)ccc1-c1nccc(Nc2cccc(C(Nc(cc3)ccc3Cl)=O)c2)n1</chem>                                |
| 9              | F517-0033        | <chem>COc1cccc(C(Nc2cc(-n3nnnc3)ccc2)=O)c1</chem>                                               |
| 10             | 8020-1623        | <chem>O=C(c1ncccc1)Nc(cccc1)c1-c1nc(-c2nccc2)no1</chem>                                         |
| 11             | G404-2528        | <chem>CCn1cnc(S(N(CCC2)C[C@@H]2C(Nc(cc(cc2)OCC)c2OCC)=O)(=O)=O)c1</chem>                        |
| 12             | F545-1102        | <chem>Cc(ccc(NC(c1cc(-c2noc(C3CCC3)n2)ccc1)=O)c1)c1F</chem>                                     |
| 13             | E715-0019        | <chem>COc(ccc(Cl)c1)c1NC([C@H])(CCC1)CN1c1ncnc2c1nc1n2CCCC1)=O</chem>                           |
| 14             | C875-0226        | <chem>Cc1ccc(CSc2nc(ccnc3)c3n2CC(Nc2cc(SC)ccc2)=O)cc1</chem>                                    |
| 15             | SB20-0299        | <chem>O=C(c1cn(C[C@@H])(CCC2)N2C(c2nccc2)=O)nn1)NCc1cccc1</chem>                                |
| 16             | F871-0649        | <chem>Cc(cc1)ccc1-c1nccc(Nc2cccc(C(Nc(cc3)cc4c3OCO4)=O)c2)n1</chem>                             |
| 17             | G756-0949        | <chem>CC(C=CN12)=CC2=NC(COc(cccc2)c2NC(Nc(cc2)cc(Cl)c2F)=O)=CC1=O</chem>                        |
| 18             | G756-0096        | <chem>COc1cccc(NC(Nc(cccc2)c2OCC(N=C2N3C=CC=C2)=CC3=O)=O)c1</chem>                              |
| 19             | G404-0917        | <chem>CCc1cccc(NC([C@H])(CCC2)CN2S(c2cn(C)cn2)(=O)=O)=O)c1</chem>                               |
| 20             | D400-2258        | <chem>Cc1noc(-c2cccc(NC(c3cc(OC)cc(OC)c3)=O)c2)n1</chem>                                        |
| 21             | F517-0037        | <chem>O=C(c1cccc(Cl)c1)Nc1cc(-n2nnnc2)ccc1</chem>                                               |
| 22             | C875-0228        | <chem>CCN(C(Cn1c(SCc2ccc(C)cc2)nc2c1nccc2)=O)c1cc(C)ccc1</chem>                                 |
| 23             | G266-0449        | <chem>CCN(c(cc(c(N1CCCC1)c1)NC(Nc(cccc2)c2OCC)=O)c1N1CC)C1=O</chem>                             |
| 24             | <u>Y031-2577</u> | <chem>CCC(Nc1cccc(C(Nc2cc(C)cc(C)c2)=O)c1)=O</chem>                                             |

|    |            |                                                                    |
|----|------------|--------------------------------------------------------------------|
| 25 | D223-0599  | CCOC(c1c(NC(C(C(C=C2)=O)=NN2c2cc(C)ccc2)=O)sc(C(C)=O)c1C)=O        |
| 26 | F305-0378  | Cc(cc1)ccc1-c(cc1)nnc1N(CCC1)C[C@H]1C(NCCc(cc1)ccc1Cl)=O           |
| 27 | L150-0763  | CCc(cc1)ccc1C(Nc1cc(-n2nnnc2)ccc1)=O                               |
| 28 | C301-7073  | CN(c(cc(c(N1CCCC1)c1)NC(Nc(cccc2)c2OC)=O)c1N1C)C1=O                |
| 29 | F321-0593  | Cc(ccc(C(Nc1cc(-c2noc(C3CCCC3)n2)ccc1)=O)c1)c1NC(c1cccc1)=O        |
| 30 | F517-0024  | COc1cc(C(Nc2cc(-n3nnnc3)ccc2)=O)cc(OC)c1                           |
| 31 | V019-7709  | Cc(cc1)cc(NC(c2cccc2)=O)c1N(CCCN1Cc(cc2)ccc2Cl)C1=O                |
| 32 | 6228-2472  | Cc1cc(NC(c2ccc(COc(cccc3)c3Br)o2)=O)cc(C)c1                        |
| 33 | G266-0623  | Cc(cc1)cc(NC(Nc(c(N2CCCC2)c2)cc(N3C)c2N(C)C3=O)=O)c1OC             |
| 34 | S926-1888  | COc1nc(CO[C@H](CCC2)CN2C(Cc2cccc2)=O)no1                           |
| 35 | G609-0057  | Cc1cc(NC(c2cc3c(-c4cccc4)onc3cc2)=O)cc(C)c1                        |
| 36 | M735-1560  | Cc1noc(C)c1CC(N1C[C@H](COc(cccc2)c2C(N2CCCC2)=O)CCC1)=O            |
| 37 | 3346-1206  | COc1cc(C(Nc(cccc2)c2-c2nc(cccc3)c3s2)=O)cc(OC)c1                   |
| 38 | F758-0012  | O=C([C@H](CCC1)CN1c1nc2cccc2n2c1ccc2)NCc1cccc1                     |
| 39 | F517-0306  | Cc(cccc1)c1C(Nc(cc(cc1)-n2nnnc2)c1N1CCCC1)=O                       |
| 40 | V028-8720  | Cc(cc1)cc(NC(Nc2cccc2)=O)c1N(CCCN1Cc(cccc2)c2F)C1=O                |
| 41 | F545-0213  | Cc1nc(-c2cccc(C(Nc3cc(C)ccc3)=O)c2)no1                             |
| 42 | F725-0689  | Cc(cc1)ccc1-c1cc(Nc2cccc(C(Nc(cc3)cc(Cl)c3OC)=O)c2)ncn1            |
| 43 | M373-1454  | O=C(Cc1cc(F)ccc1)N(CCC1)C[C@H]1c1cnc(Nc(ccc2)c2F)n1                |
| 45 | P634-0305  | CN(CCC1cncnc1)C(CC[C@H](CCC1)CN1c1ncnc(NC2CC2)c1)=O                |
| 46 | C301-4436  | O=C(c1cc(Nc2nc(cccc3)c3n3c2nnc3)ccc1)NCCc1cccc1                    |
| 47 | J077-1053  | C[C@H](c1cccc(NC(c2cccc(N(CCCN3Cc(cccc4)c4F)C3=O)c2)=O)c1)O        |
| 48 | F545-1038  | COc1cc(NC(c2cc(-c3noc(C4CCCC4)n3)ccc2)=O)cc(OC)c1OC                |
| 49 | D699-0125  | CCOC([C@H](CCC1)CN1C(Cn1c2nc(-n3nc(C)cc3C)nnc2c2c1cccc2)=O)=O      |
| 50 | F720-1196  | CCOC(c1cccc(NC([C@H](CCC2)CN2C(C=C2)=NN(c3cccc(Cl)c3)C2=O)=O)c1)=O |
| 51 | V022-7328  | Cc(cc1)cc(NC(c(cc2)ccc2OC)=O)c1N(CCCN1Cc2c(C)cccc2)C1=O            |
| 52 | D444-0755  | Cc1cc([C@H](c(cc2)ccc2Cl)Nc2nc(C)cc(C)n2)c(NC(c2cccc2)=O)s1        |
| 53 | G609-0354  | Cc(cc1)ccc1-c1c(cc(cc2)C(Nc3cc(C)cc(C)c3)=O)c2no1                  |
| 54 | C155-0612  | C[C@H](CC1)CC[C@H]1C(N[C@H](Cc1cccc1)C(NC1cncnc1)=O)=O             |
| 55 | P181-1188  | Cc1cc(C(Nc2c(-c3nc(-c4cc(F)ccc4)no3)sc2)=O)cc(C)c1                 |
| 56 | L829-0029  | CC(C)[C@H](c1nc(-c2cccc(-c3csc(C)n3)c2)no1)NC(c1cccc1)=O           |
| 57 | F545-0059  | Cc1nc(-c2cccc(C(NCc3cccc3)=O)c2)no1                                |
| 58 | L361-0965  | Cc1cc(NC(Nc2c(CCC3nc(cccc4)c4n3C)cccc2)=O)cc(C)c1                  |
| 59 | 6466-1310  | CCOc(cccc1)c1NC(c(cnn1c(C(F)F)c2)c1nc2-c1cccc1)=O                  |
| 60 | Y042-7013  | CSCC[C@H](c1nc(cccc2)c2[nH]1)NC(c1cc(Nc2ncccc2)ccc1)=O             |
| 61 | F431-0588  | CN(c(c(N1C)c2)cc(NC(c(cc3)cc(OC)c3OC)=O)c2Sc(cccc2)c2Cl)C1=O       |
| 62 | G609-0017  | COc1cc(NC(c2cc3c(-c4cccc4)onc3cc2)=O)cc(OC)c1OC                    |
| 63 | Y200-4626F | Cc1cc(C(Nc2cccc(C(NCc3cccc3)=O)c2)=O)no1                           |
| 64 | G609-0485  | CCc1cccc(NC(c2cc3c(-c4ccc(C)cc4)onc3cc2)=O)c1                      |
| 65 | P188-1446  | COc1cc(NC(CN(C=Cc2c3n(Cc4cccc(F)c4)cc2)C3=O)=O)cc(OC)c1            |
| 66 | G856-0108  | O=C(c1cc(F)ccc1)Nc(cccc1)c1-c1nc(cccc2)c2s1                        |

|    |                  |                                                                                     |
|----|------------------|-------------------------------------------------------------------------------------|
| 67 | M337-0336        | <chem>CCc1nnc(-c2cc(n(CC(NCc3ncccc3)=O)cc3)c3cc2)o1</chem>                          |
| 68 | J077-0953        | <chem>Cc1cccc(CN(CCCN2c3cc(C(NCc4ncccc4)=O)ccc3)C2=O)c1</chem>                      |
| 69 | C326-0168        | <chem>C[C@@](C[C@H]1N2)(N(c3cc(C(Nc(cc4)ccc4OC)=O)ccc3)C2=O)Oc2c1cccc2OC</chem>     |
| 70 | P806-0813        | <chem>O=C(c1cocc1)N[C@@H](CCC1)CN1c1cc(-c(cc2)ccc2F)n[nH]1</chem>                   |
| 71 | F177-0089        | <chem>COc1cc(NC(c(cccc2)c2-c2nc(-c3cccc3)no2)=O)cc(OC)c1OC</chem>                   |
| 72 | G786-1401        | <chem>CSc(cc1)ccc1C(Nc1nc(-c2ccncc2)cs1)=O</chem>                                   |
| 73 | F779-1163        | <chem>Cn1c(cccc2)c2nc1CCc1cccc(NC(c2cccc2)=O)c1</chem>                              |
| 74 | D103-1046        | <chem>Cc(cc1)cc2c1OC(C(Nc1c(C(c3cccc3)=O)oc3c1cccc3)=O)=CC2=O</chem>                |
| 75 | Y031-2590        | <chem>CCC(Nc1cccc(C(Nc2cc(OC)ccc2)=O)c1)=O</chem>                                   |
| 76 | D223-0622        | <chem>Cc1cccc(N(C=C2)N=C(C(Nc3c(C(NC[C@@H]4OCCCC4)=O)c(CCC4)c4s3)=O)C2=O)c1</chem>  |
| 77 | C201-0252        | <chem>C[C@@](C[C@H]1N2)(N(c3cc(C(Nc(cc4OC)cc(OC)c4OC)=O)ccc3)C2=O)Oc2c1cccc2</chem> |
| 78 | L539-0085        | <chem>COc(cc1)ccc1Oc1ccnc(-c2cccc(C(NCc(cc3)ccc3Cl)=O)c2)n1</chem>                  |
| 79 | G546-0546        | <chem>COc1cc(NC(c2cc(-c3ncccc3)nc3cccc23)=O)cc(OC)c1OC</chem>                       |
| 80 | <u>G416-5459</u> | <chem>Cc1cccc(NC(c2cc(NS(c(cc3)cc(OC)c3OC)(=O)=O)cnc2)=O)c1</chem>                  |
